CORRECTION

# Correction: Diving apart together: call propagation in diving long-finned pilot whales

Annebelle C. M. Kok, Lisette van Kolfshoten, James A. Campbell, Alexander M. von Benda-Beckmann, Patrick J. O. Miller, Hans Slabbekoorn and Fleur Visser

There was an error published in *J. Exp. Biol.* (2020) **223**, jeb207878 (doi:10.1242/jeb.207878).

Fig. 3B was mistakenly a duplication of Fig. 3A. The corrected and original versions of Fig. 3 are shown below; both the online full-text and PDF versions of the article have been updated. The authors apologise to the readers for this error, which does not affect the conclusions of the paper.

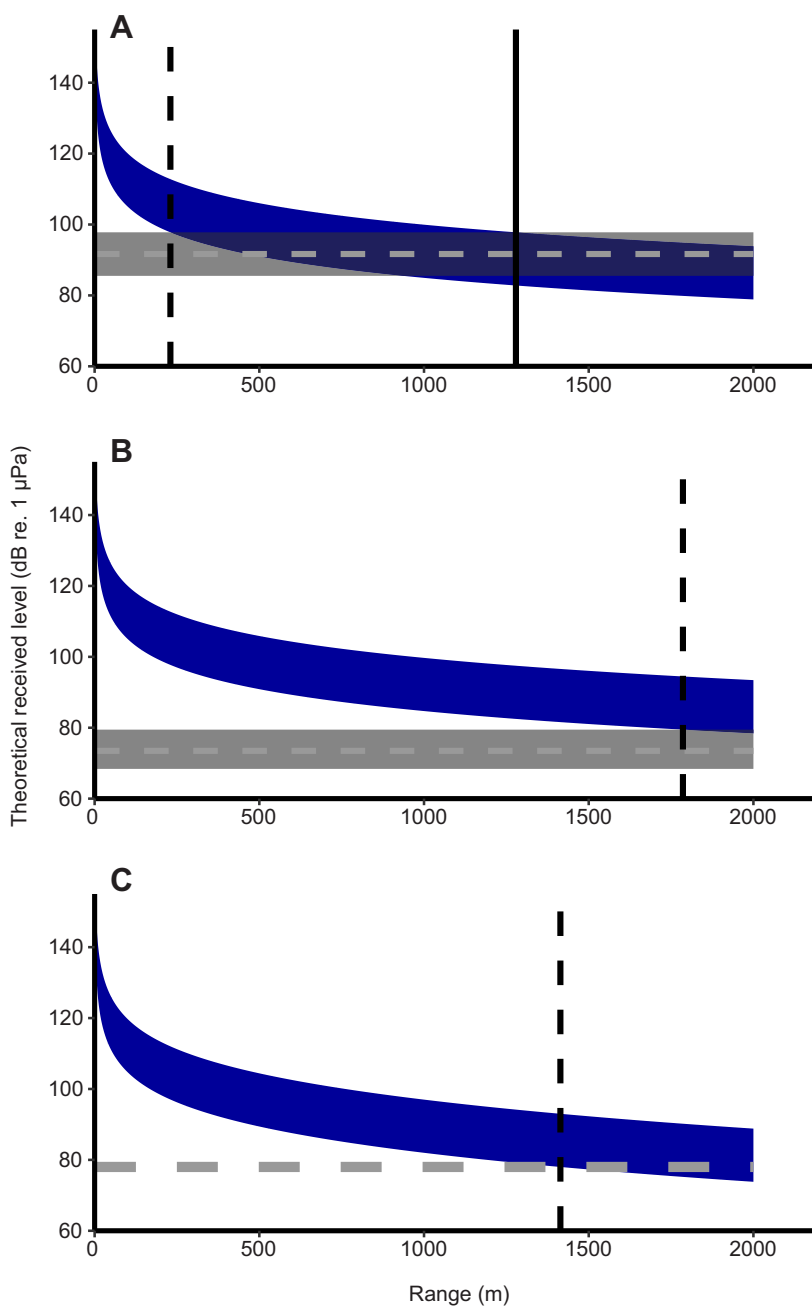

**Fig. 3 (corrected). Sound propagation modelling for a pure tone (dark blue) over a range of 2000 m.** (A) 1 kHz, (B) 5 kHz and (C) 20 kHz pure tone with source level of 145–160 dB. Medians with 25 and 75 percentile detection thresholds (A and B, grey dashed line and grey shaded area, respectively) and Wenz ambient noise level (C, grey dashed line) influenced signal detection at frequency-specific distances. Signals with a low source level dropped below the maximum detection threshold at some point for all frequencies (vertical dashed black lines). For 1 kHz signals, signals with a high source level also dropped below the detection threshold at 1279 m (vertical solid black line).

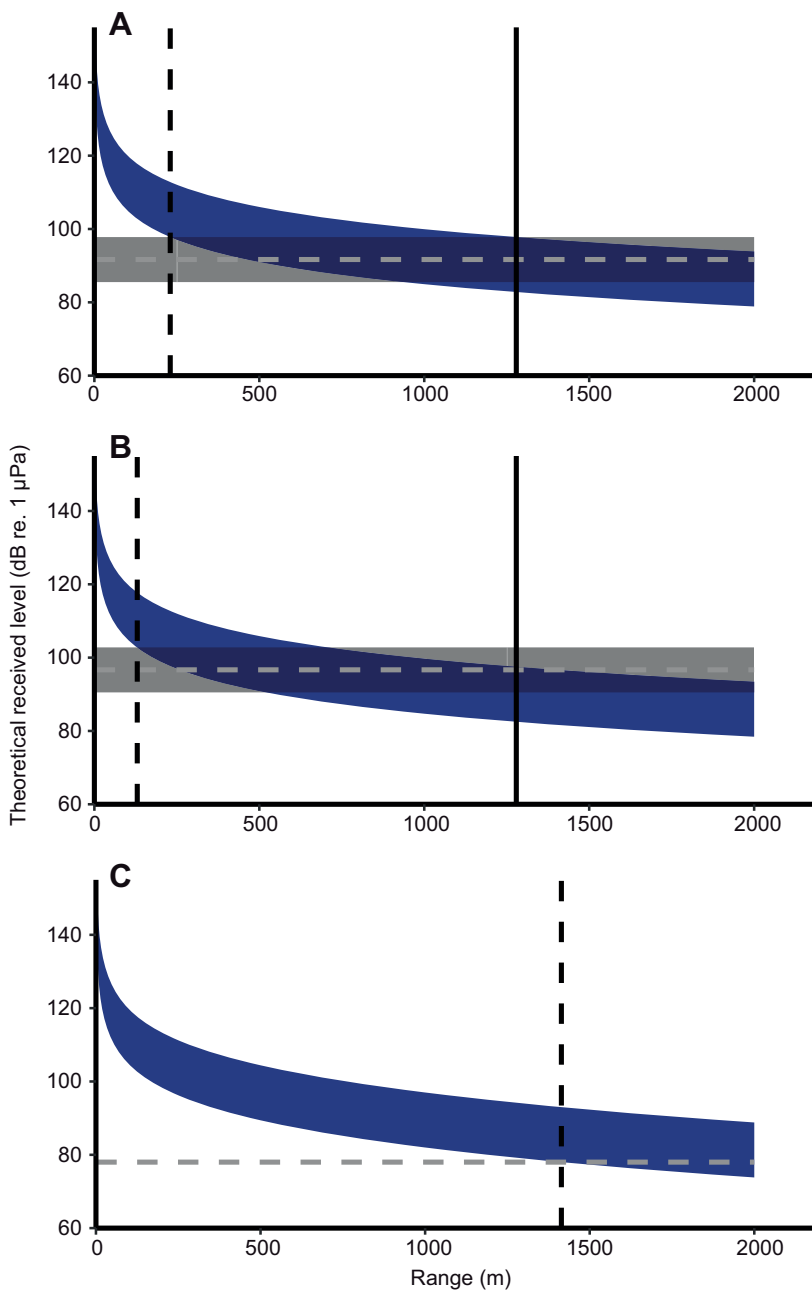

**Fig. 3 (original). Sound propagation modelling for a pure tone (dark blue) over a range of 2000 m.** (A) 1 kHz, (B) 5 kHz and (C) 20 kHz pure tone with source level of 145–160 dB. Medians with 25 and 75 percentile detection thresholds (A and B, grey dashed line and grey shaded area, respectively) and Wenz ambient noise level (C, grey dashed line) influenced signal detection at frequency-specific distances. Signals with a low source level dropped below the maximum detection threshold at some point for all frequencies (vertical dashed black lines). For 1 kHz signals, signals with a high source level also dropped below the detection threshold at 1279 m (vertical solid black line).
